# Supplementary material
Source: PubMed Central journal article supplement (PMC6186386)
Supplement: NIHMS947511-supplement-esi.pdf [file NIHMS947511-supplement-esi.pdf]

## Supplementary Material for

### Infrared Ion Spectroscopy: An Analytical Tool for the Study of Metabolites

Adam P. Cismesia, Matthew R. Bell, Larry F. Tesler, Melanie Alves,

and Nicolas C. Polfer\*

*\* Correspondence to Nicolas C. Polfer, Department of Chemistry, University of Florida, P.O. Box 117200, Gainesville, FL 32611-7200, USA.  
Email: polfer@chem.ufl.edu*

#### Contents:

1. Reproducibility of IRMPD and IRPD spectra
2. IRPD spectra of PABA•ACN as a function of cryoLIT temperature

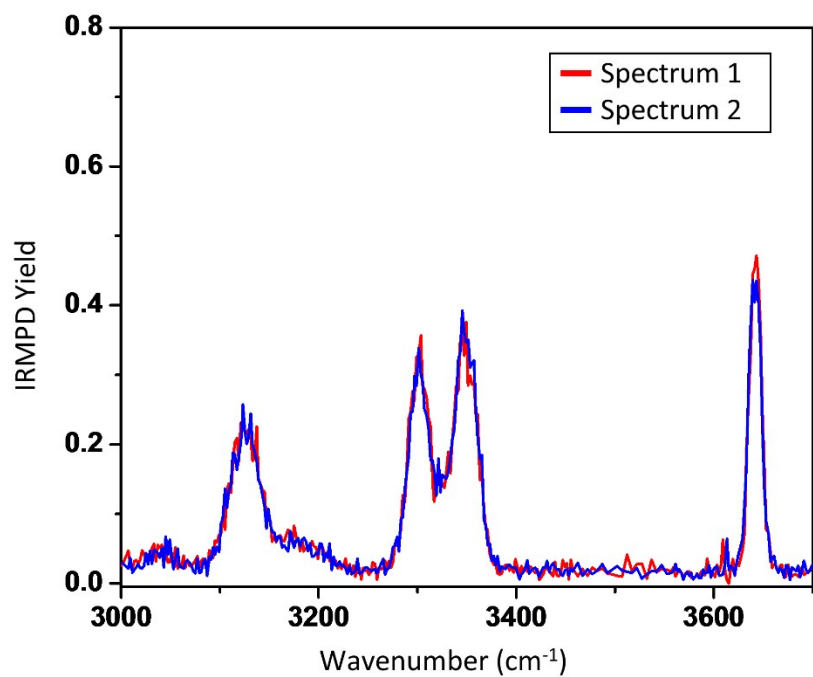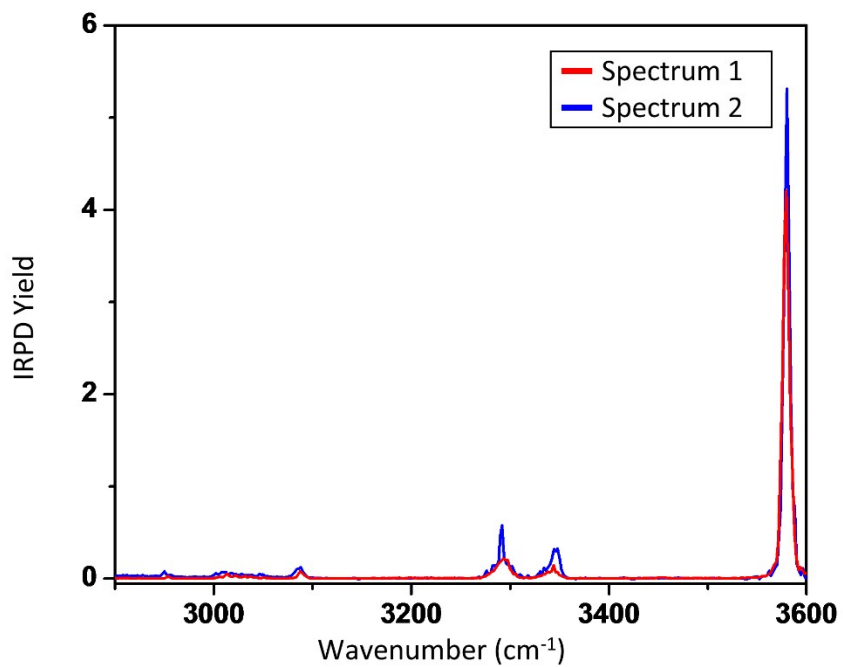

**1. Reproducibility of IRMPD and IRPD spectra**

**Figure S1:** Reproducibility of spectra for IRMPD of tyramine (Top) and IRPD of PABA•ACN (Bottom).

**2. IRPD Spectra of PABA•ACN as a function of cryoLIT temperature**

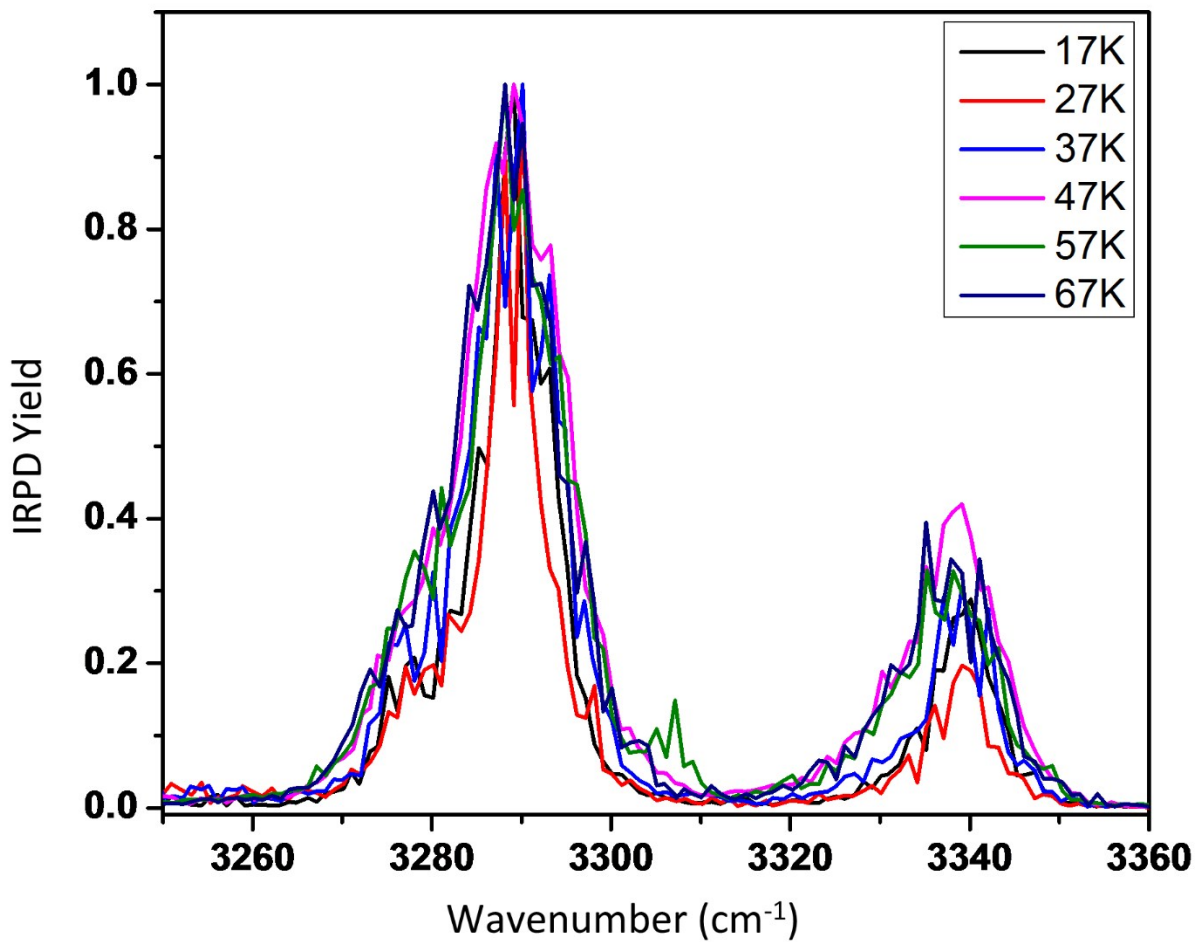

**Figure S2:** A temperature study of PABA•ACN over the N-H vibrational modes from 17-67K.
